# Supplementary material
Source: publisher figshare collection journal article supplement (https://acs.figshare.com/ndownloader/files/26218360)
Supplement: Supplementary file 1 [file 26218360]

# Proteomic Analysis Identifies Dysregulated Proteins in Butanol Tolerant Gram-positive *Lactobacillus mucosae* BR0713-33

Siqing Liu<sup>1\*</sup>, Nasib Qureshi<sup>2</sup>, Kenneth Bischoff<sup>1\*\*</sup> and Costel C. Darie<sup>3\*</sup>

<sup>1</sup>Renewable Product Technology Research Unit, National Center for Agricultural Utilization Research, Agricultural Research Service, U.S. Department of Agriculture, Peoria, IL 61604, USA

<sup>2</sup>Bioenergy Research Unit, National Center for Agricultural Utilization Research, Agricultural Research Service, U.S. Department of Agriculture, Peoria, IL 61604, USA

<sup>3</sup>Biochemistry & Proteomics Group, Department of Chemistry & Biomolecular Science, Clarkson University, Potsdam, NY, 13699, USA

\* Correspondence: Siqing.Liu@usda.gov, [cdarie@clarkson.edu](mailto:cdarie@clarkson.edu)

\*\* The authors dedicate this study to the memory of our colleague Dr. Kenneth Bischoff

## Supplemental Material:

**Figure S1A.** 2D Gel Difference Image (2835 #3) of averaged 2% butanol (gels 2835 #3-4) versus averaged control (gels 2835 #1-2). Polypeptide spots increased in 2% butanol vs control are outlined in blue, while spots decreased in 2% butanol vs control are outlined in red. **Figure S1B.** 2D Gel Difference Image (2835 #2) of control to show spots increased in averaged control (gels 2835 #1-2) versus averaged 2% butanol (gels 2835 #3-4). Polypeptide spots increased in 2% butanol vs control are outlined in blue, while spots decreased in 2% butanol vs control are outlined in red.

**Figure S2A.** 2D Gel Difference Image (2835 #5) of averaged 3% butanol (gels 2835 #5-6) versus averaged control (gels 2835 #1-2). Polypeptide spots increased in 3% butanol vs control are outlined in blue, while spots decreased in 3% butanol vs control are outlined in red. **Figure S2B.** 2D Gel Difference Image (2835 #2) of control to show spots increased in averaged control (gels 2835 #1-2) (in red) versus averaged 3% butanol (gels 2835 #5-6). Polypeptide spots increased in 3% butanol vs control are outlined in blue, while spots decreased in 3% butanol vs control are outlined in red.

**Table S1.** 2D-gel computational image analyses of protein spots from *L. musosae* with increased expression in response to growth in media containing 2, 3 and 4% butanol versus 0% butanol (39 spots).

**Table S2.** 2D-gel computational image analyses of protein spots from *L. musosae* with decreased expression in response to growth in media containing 2, 3 and 4% butanol versus 0% butanol (14 spots).

# Figure S1

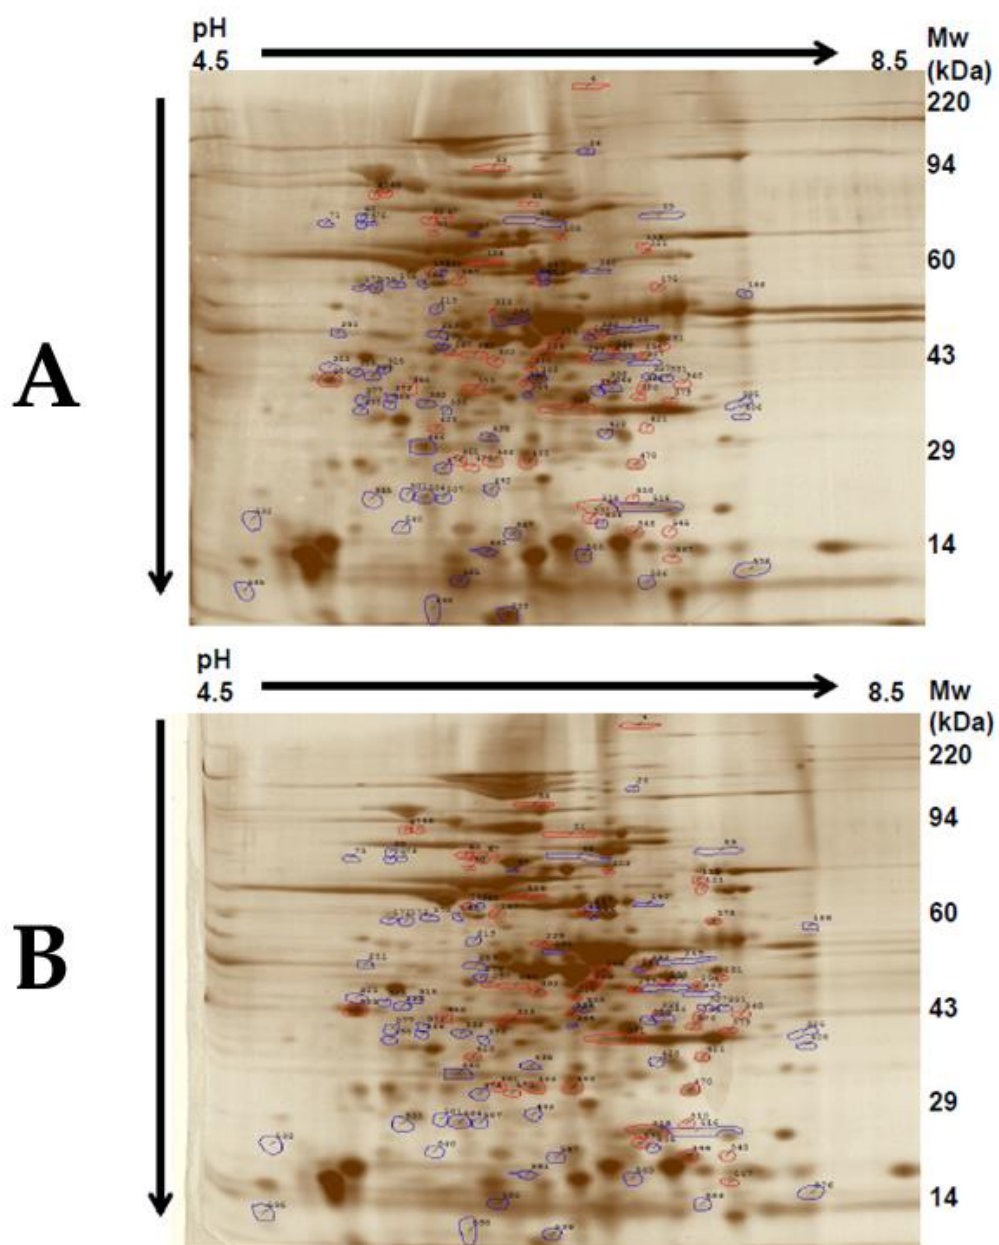

# Figure S2

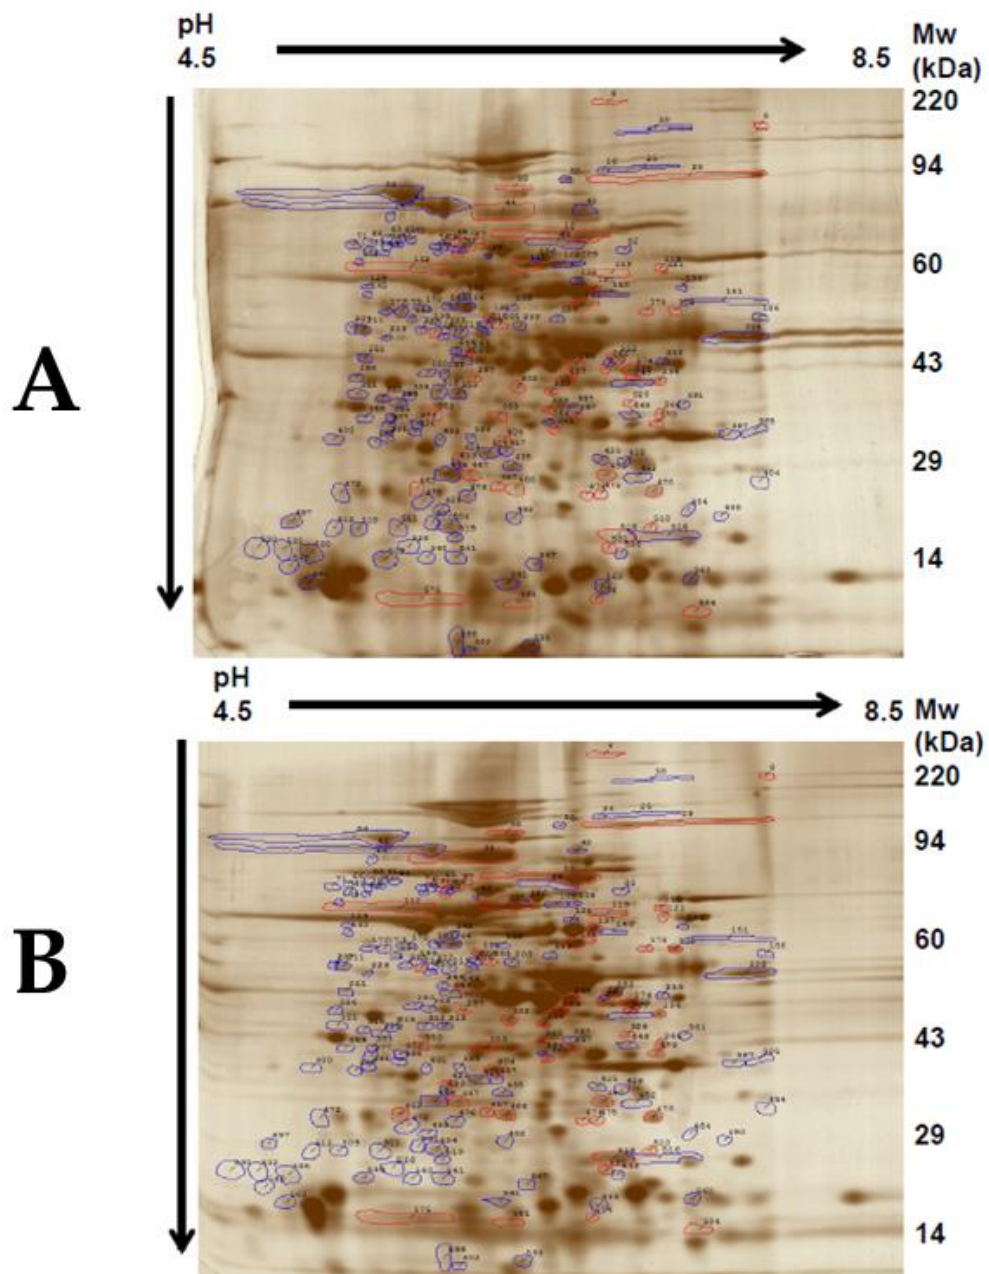

# Table S1

2D-gel computational image analyses of protein spots from *L. musosae* with increased expression in response to growth in media containing 2, 3 and 4% butanol versus 0% butanol (39 spots).

|      |     |         | 2% Butanol | 2% Butanol | 3% Butanol | 3% Butanol | 4% Butanol | 4% Butanol | Montage |
|------|-----|---------|------------|------------|------------|------------|------------|------------|---------|
| Spot |     |         | vs Control | Image   |
| #    | PI  | MW      | Difference | T-test (p) | Difference | T-test (p) | Difference | T-test (p) | Page #  |
| 10   | 6.1 | 104,462 | 0.046      | 0.069      | 0.134      | 0.020      | 2.3        | 0.219      | 3.4     |
| 26   | 5.9 | 80,477  | 10.5       | 0.376      | 8.9        | 0.012      | 5.8        | 0.011      | 25      |
| 60   | 5.0 | 56,123  | 12.0       | 0.017      | 36.9       | 0.182      | 13.5       | 0.048      | 27      |
| 68   | 5.7 | 54,220  | 5.1        | 0.001      | 8.9        | 0.002      | 5.3        | 0.166      | 28      |
| 71   | 4.8 | 54,200  | 7.8        | 0.008      | 26.7       | 0.003      | 28.7       | 0.008      | 29      |
| 73   | 5.0 | 53,904  | 11.0       | 0.165      | 17.2       | 0.140      | 8.4        | 0.015      | 31      |
| 163  | 5.3 | 40,114  | 10.2       | 0.152      | 5.5        | 0.008      | 10.7       | 0.025      | 36      |
| 166  | 5.8 | 40,054  | 6.2        | 0.000      | 2.6        | 0.432      | 18.7       | 0.000      | 37      |
| 168  | 5.6 | 40,054  | 1.8        | 0.286      | 7.3        | 0.019      | 9.4        | 0.019      | 171     |
| 170  | 5.2 | 39,934  | 4.6        | 0.004      | 3.8        | 0.039      | 3.0        | 0.046      | 38      |
| 172  | 5.0 | 39,639  | 8.5        | 0.008      | 8.3        | 0.029      | 7.5        | 0.006      | 39      |
| 173  | 5.1 | 39,639  | 4.8        | 0.008      | 4.1        | 0.056      | 3.3        | 0.021      | 40      |
| 186  | 6.6 | 39,233  | 5.0        | 0.134      | 9.5        | 0.008      | 9.8        | 0.097      | 41      |
| 207  | 4.8 | 37,525  | 1.9        | 0.277      | 7.2        | 0.053      | 8.2        | 0.006      | 177     |
| 251  | 4.9 | 34,083  | 1.7        | 0.046      | 3.1        | 0.007      | 4.2        | 0.007      | 45      |
| 253  | 5.4 | 33,891  | 1.7        | 0.034      | 3.1        | 0.021      | 3.4        | 0.043      | 46      |
| 311  | 4.8 | 29,795  | 2.3        | 0.007      | 9.1        | 0.200      | 6.4        | 0.018      | 51      |
| 312  | 5.3 | 29,762  | 2.8        | 0.055      | 13.4       | 0.010      | 4.3        | 0.008      | 190     |
| 315  | 5.2 | 29,553  | 4.0        | 0.017      | 9.2        | 0.007      | 5.1        | 0.031      | 52      |
| 318  | 5.0 | 29,251  | 4.8        | 0.000      | 10.7       | 0.144      | 7.8        | 0.186      | 53      |
| 323  | 5.0 | 30,438  | 3.3        | 0.005      | 4.7        | 0.001      | 4.4        | 0.101      | 54      |
| 331  | 6.3 | 28,871  | 3.7        | 0.090      | 5.8        | 0.003      | 5.4        | 0.010      | 56      |
| 337  | 5.8 | 28,428  | NC         | 0.045      | 10.9       | 0.522      | 36.1       | 0.079      | 192     |
| 372  | 5.2 | 29,356  | 6.2        | 0.002      | 9.0        | 0.121      | 8.3        | 0.212      | 61      |
| 385  | 6.6 | 26,994  | 3.3        | 0.246      | 6.2        | 0.001      | 7.6        | 0.323      | 64      |
| 386  | 5.2 | 28,657  | 5.5        | 0.032      | 14.6       | 0.005      | 10.8       | 0.002      | 65      |
| 387  | 6.5 | 26,699  | 2.4        | 0.065      | 3.8        | 0.003      | 5.2        | 0.001      | 195     |
| 395  | 5.0 | 26,248  | 1.9        | 0.044      | 5.6        | 0.031      | 5.0        | 0.024      | 66      |
| 435  | 5.6 | 24,281  | 3.4        | 0.065      | 3.9        | 0.044      | 3.6        | 0.173      | 70      |
| 451  | 6.2 | 23,681  | 2.3        | 0.113      | 1.8        | 0.270      | 11.2       | 0.015      | 274     |
| 497  | 4.3 | 20,345  | 1.6        | 0.555      | 5.9        | 0.052      | 3.6        | 0.033      | 210     |
| 501  | 5.2 | 20,133  | 3.5        | 0.077      | 10.5       | 0.018      | 8.9        | 0.013      | 74      |
| 511  | 5.0 | 19,758  | 3.2        | 0.012      | 11.1       | 0.074      | 12.1       | 0.151      | 77      |
| 516  | 6.2 | 19,374  | 10.4       | 0.014      | 6.9        | 0.029      | 5.4        | 0.036      | 78      |
| 536  | 6.0 | 18,005  | 3.4        | 0.016      | 4.2        | 0.010      | 4.5        | 0.020      | 80      |
| 540  | 5.2 | 17,637  | 3.9        | 0.156      | 4.0        | 0.086      | 4.1        | 0.014      | 81      |
| 548  | 4.3 | 16,972  | 1.4        | 0.450      | 4.0        | 0.091      | 4.6        | 0.047      | 219     |
| 598  | 5.3 | 5,630   | 5.2        | 0.125      | 11.1       | 0.016      | 7.4        | 0.224      | 89      |
| 599  | 5.6 | 4,507   | 5.7        | 0.001      | 5.7        | 0.022      | 8.6        | 0.006      | 90      |

# Table S2

2D-gel computational image analyses of protein spots from *L. musosae* with decreased expression in response to growth in media containing 2, 3 and 4% butanol versus 0% butanol (14 spots).

|      |     |         | 2% Butanol | 2% Butanol | 3% Butanol | 3% Butanol | 4% Butanol | 4% Butanol | Montage |
|------|-----|---------|------------|------------|------------|------------|------------|------------|---------|
| Spot |     |         | vs Control | Image   |
| #    | PI  | MW      | Difference | T-test (p) | Difference | T-test (p) | Difference | T-test (p) | Page #  |
| 4    | 5.9 | 156,045 | -2.7       | 0.037      | -4.8       | 0.033      | -3.2       | 0.033      | 91      |
| 33   | 5.6 | 73,721  | -7.7       | 0.002      | -10.3      | 0.001      | -2.2       | 0.131      | 92      |
| 46   | 5.1 | 64,434  | -5.3       | 0.023      | -2.1       | 0.072      | -3.9       | 0.021      | 93      |
| 65   | 5.3 | 54,649  | -4.1       | 0.191      | -4.5       | 0.183      | -9.3       | 0.145      | 96      |
| 111  | 5.6 | 47,635  | -1.5       | 0.059      | -4.5       | 0.005      | -20.8      | 0.002      | 227     |
| 113  | 6.1 | 48,027  | -4.7       | 0.019      | -19.5      | 0.014      | -10.1      | 0.015      | 100     |
| 121  | 6.2 | 45,551  | -6.7       | 0.035      | -17.7      | 0.028      | -27.7      | 0.105      | 101     |
| 175  | 6.2 | 39,835  | -5.8       | 0.035      | -26.2      | 0.017      | -5.5       | 0.026      | 106     |
| 252  | 6.0 | 34,011  | -4.7       | 0.012      | -53.5      | 0.005      | -9.1       | 0.007      | 108     |
| 270  | 5.9 | 32,754  | -2.2       | 0.129      | -3.9       | 0.043      | -11.4      | 0.031      | 237     |
| 302  | 5.6 | 30,600  | -5.0       | 0.003      | -3.2       | 0.008      | -4.1       | 0.007      | 117     |
| 462  | 5.2 | 22,618  | -1.8       | 0.073      | -3.8       | 0.022      | -13.6      | 0.014      | 246     |
| 463  | 5.7 | 22,629  | -1.9       | 0.022      | -1.2       | 0.480      | -7.1       | 0.003      | 132     |
| 466  | 5.6 | 22,592  | -2.4       | 0.029      | -4.5       | 0.065      | -7.4       | 0.009      | 133     |
